# Supplementary material for: Minimal influence of future Arctic sea ice loss on North Atlantic jet stream morphology
Source: Copernicus journal article supplement (doi:10.5194/egusphere-2024-2506), 2024-08-16
Supplement: Supplementary file 1 [file egusphere-2024-2506-supplement.pdf]

# Minimal influence of future Arctic sea ice loss on North Atlantic jet stream morphology- Supplementary Information

**Table S1:** Summary of jet latitude statistics

| Model                  | Jet latitude $\mu$ ( $^{\circ}$ ) |                 | Jet latitude daily $\sigma$ ( $^{\circ}$ ) |        | Jet latitude interannual $\sigma$ ( $^{\circ}$ ) |        | Jet latitude skew |        | Jet latitude p(K-S) |
|------------------------|-----------------------------------|-----------------|--------------------------------------------|--------|--------------------------------------------------|--------|-------------------|--------|---------------------|
|                        | Present-day                       | Future          | Present-day                                | Future | Present-day                                      | Future | Present-day       | Future |                     |
| <b>AWI-CM-1-1-MR</b>   | 46.9 $\pm$ 0.10                   | 46.3 $\pm$ 0.10 | 9.5                                        | 9.5    | 2.5                                              | 2.9    | 0.4               | 0.4    | 0.18                |
| <b>CanESM5</b>         | 49.7 $\pm$ 0.07                   | 48.8 $\pm$ 0.07 | 7.1                                        | 7.0    | 2.6                                              | 2.4    | 0.1               | 0.3    | 0.043               |
| <b>FGOALS-f3-L</b>     | 47.7 $\pm$ 0.08                   | 46.7 $\pm$ 0.09 | 7.8                                        | 8.1    | 2.2                                              | 2.4    | 0.3               | 0.4    | 0.03                |
| <b>HadGEM3-GC31-MM</b> | 48.3 $\pm$ 0.06                   | 47.7 $\pm$ 0.06 | 9.8                                        | 10.4   | 2.8                                              | 3.0    | 0.1               | 0.2    | 0.0059              |
| <b>IPSL-CM6A-LR</b>    | 46.3 $\pm$ 0.09                   | 46.1 $\pm$ 0.08 | 12.2                                       | 11.0   | 3.7                                              | 3.0    | 0.3               | 0.4    | 0.062               |
| <b>MIROC6</b>          | 46.4 $\pm$ 0.12                   | 46.2 $\pm$ 0.13 | 11.5                                       | 11.9   | 3.1                                              | 3.3    | 0.2               | 0.3    | 1.00                |

**Table S2:** Summary of jet speed statistics

| Model                  | Jet speed $\mu$ ( $\text{ms}^{-1}$ ) |                 | Jet speed daily $\sigma$ ( $\text{ms}^{-1}$ ) |        | Jet speed interannual $\sigma$ ( $\text{ms}^{-1}$ ) |        | Jet speed skew |        | Jet speed p(K-S) |
|------------------------|--------------------------------------|-----------------|-----------------------------------------------|--------|-----------------------------------------------------|--------|----------------|--------|------------------|
|                        | Present-day                          | Future          | Present-day                                   | Future | Present-day                                         | Future | Present-day    | Future |                  |
| <b>AWI-CM-1-1-MR</b>   | 13.1 $\pm$ 0.03                      | 13.0 $\pm$ 0.03 | 2.6                                           | 2.6    | 0.7                                                 | 0.7    | 0.1            | 0.1    | 0.98             |
| <b>CanESM5</b>         | 13.9 $\pm$ 0.02                      | 13.9 $\pm$ 0.02 | 2.2                                           | 2.1    | 0.6                                                 | 0.6    | 0.05           | 0.05   | 1.00             |
| <b>FGOALS-f3-L</b>     | 13.6 $\pm$ 0.03                      | 13.5 $\pm$ 0.03 | 2.4                                           | 2.5    | 0.7                                                 | 0.7    | -0.02          | 0.05   | 1.00             |
| <b>HadGEM3-GC31-MM</b> | 12.7 $\pm$ 0.02                      | 12.6 $\pm$ 0.02 | 2.6                                           | 2.7    | 0.8                                                 | 0.7    | 0.1            | 0.1    | 0.80             |
| <b>IPSL-CM6A-LR</b>    | 12.8 $\pm$ 0.02                      | 13.0 $\pm$ 0.02 | 3.3                                           | 3.0    | 0.9                                                 | 0.9    | 0.2            | 0.1    | 0.85             |
| <b>MIROC6</b>          | 12.0 $\pm$ 0.03                      | 11.9 $\pm$ 0.03 | 2.9                                           | 3.0    | 0.8                                                 | 0.8    | 0.2            | 0.2    | 0.70             |

**Table S3:** Summary of jet mass statistics

| Model                  | Jet mass $\mu$ ( $\times 10^{13}$ ms $^{-1}$ ) |                 | Jet mass daily $\sigma$ ( $\times 10^{13}$ ms $^{-1}$ ) |        | Jet mass interannual $\sigma$ ( $\times 10^{13}$ ms $^{-1}$ ) |        | Jet mass skew |        | Jet mass p(K-S) |
|------------------------|------------------------------------------------|-----------------|---------------------------------------------------------|--------|---------------------------------------------------------------|--------|---------------|--------|-----------------|
|                        | Present-day                                    | Future          | Present-day                                             | Future | Present-day                                                   | Future | Present-day   | Future |                 |
| <b>AWI-CM-1-1-MR</b>   | 8.6 $\pm$ 0.04                                 | 8.3 $\pm$ 0.04  | 3.6                                                     | 3.5    | 1.3                                                           | 1.3    | -0.01         | -0.03  | 0.82            |
| <b>CanESM5</b>         | 10.9 $\pm$ 0.04                                | 10.5 $\pm$ 0.04 | 3.9                                                     | 3.7    | 1.4                                                           | 1.4    | -0.3          | -0.2   | 0.83            |
| <b>FGOALS-f3-L</b>     | 9.8 $\pm$ 0.04                                 | 9.6 $\pm$ 0.04  | 3.6                                                     | 3.7    | 1.3                                                           | 1.3    | -0.2          | -0.1   | 0.85            |
| <b>HadGEM3-GC31-MM</b> | 8.2 $\pm$ 0.02                                 | 7.8 $\pm$ 0.02  | 3.5                                                     | 3.5    | 1.3                                                           | 1.2    | -0.05         | -0.02  | 0.12            |
| <b>IPSL-CM6A-LR</b>    | 8.0 $\pm$ 0.03                                 | 8.1 $\pm$ 0.03  | 4.0                                                     | 3.8    | 1.5                                                           | 1.5    | 0.1           | 0.06   | 0.99            |
| <b>MIROC6</b>          | 7.0 $\pm$ 0.04                                 | 6.8 $\pm$ 0.04  | 3.4                                                     | 3.3    | 1.1                                                           | 1.2    | 0.04          | 0.2    | 0.83            |

**Table S4:** Summary of jet area statistics

| Model                  | Jet area $\mu$ ( $\times 10^{12}$ m $^2$ ) |                | Jet area daily $\sigma$ ( $\times 10^{12}$ m $^2$ ) |        | Jet area interannual $\sigma$ ( $\times 10^{12}$ m $^2$ ) |        | Jet area skew |        | Jet area p(K-S) |
|------------------------|--------------------------------------------|----------------|-----------------------------------------------------|--------|-----------------------------------------------------------|--------|---------------|--------|-----------------|
|                        | Present-day                                | Future         | Present-day                                         | Future | Present-day                                               | Future | Present-day   | Future |                 |
| <b>AWI-CM-1-1-MR</b>   | 6.3 $\pm$ 0.02                             | 6.1 $\pm$ 0.02 | 2.3                                                 | 2.2    | 0.9                                                       | 0.8    | -0.3          | -0.3   | 0.49            |
| <b>CanESM5</b>         | 7.6 $\pm$ 0.02                             | 7.4 $\pm$ 0.02 | 2.3                                                 | 2.2    | 0.9                                                       | 0.9    | -0.5          | -0.4   | 0.65            |
| <b>FGOALS-f3-L</b>     | 7.0 $\pm$ 0.02                             | 6.8 $\pm$ 0.02 | 2.2                                                 | 2.2    | 0.8                                                       | 0.8    | -0.5          | -0.4   | 0.44            |
| <b>HadGEM3-GC31-MM</b> | 6.2 $\pm$ 0.01                             | 5.9 $\pm$ 0.01 | 2.3                                                 | 2.3    | 0.9                                                       | 0.8    | -0.3          | -0.3   | 0.06            |
| <b>IPSL-CM6A-LR</b>    | 5.9 $\pm$ 0.02                             | 5.8 $\pm$ 0.02 | 2.6                                                 | 2.4    | 0.9                                                       | 0.9    | -0.2          | -0.2   | 0.88            |
| <b>MIROC6</b>          | 5.5 $\pm$ 0.02                             | 5.3 $\pm$ 0.02 | 2.3                                                 | 2.3    | 0.8                                                       | 0.9    | -0.2          | -0.1   | 0.65            |

**Table S5:** Summary of jet tilt statistics

| Model                | Jet tilt $\mu$ ( $^{\circ}$ ) |                | Jet tilt daily $\sigma$ ( $^{\circ}$ ) |        | Jet tilt interannual $\sigma$ ( $^{\circ}$ ) |        | Jet tilt skew |        | Jet tilt p(K-S) |
|----------------------|-------------------------------|----------------|----------------------------------------|--------|----------------------------------------------|--------|---------------|--------|-----------------|
|                      | Present-day                   | Future         | Present-day                            | Future | Present-day                                  | Future | Present-day   | Future |                 |
| <b>AWI-CM-1-1-MR</b> | 6.2 $\pm$ 0.11                | 6.2 $\pm$ 0.10 | 10.1                                   | 9.8    | 2.5                                          | 2.4    | -0.3          | -0.3   | 1.00            |
| <b>CanESM5</b>       | 9.0 $\pm$ 0.09                | 8.2 $\pm$ 0.09 | 8.7                                    | 8.8    | 2.4                                          | 2.2    | -0.2          | -0.3   | 0.26            |
| <b>FGOALS-f3-L</b>   | 4.0 $\pm$ 0.10                | 4.0 $\pm$ 0.10 | 9.3                                    | 9.6    | 2.3                                          | 2.6    | -0.05         | -0.04  | 1.00            |

|                        |                |                |      |      |     |     |      |       |      |
|------------------------|----------------|----------------|------|------|-----|-----|------|-------|------|
| <b>HadGEM3-GC31-MM</b> | $7.4 \pm 0.06$ | $7.0 \pm 0.06$ | 9.6  | 9.7  | 2.4 | 2.5 | -0.3 | -0.3  | 0.30 |
| <b>IPSL-CM6A-LR</b>    | $6.4 \pm 0.08$ | $6.2 \pm 0.08$ | 10.3 | 10.1 | 2.7 | 2.4 | -0.4 | -0.3  | 0.97 |
| <b>MIROC6</b>          | $6.1 \pm 0.10$ | $5.9 \pm 0.10$ | 9.8  | 9.5  | 2.4 | 2.3 | -0.3 | -0.05 | 0.90 |

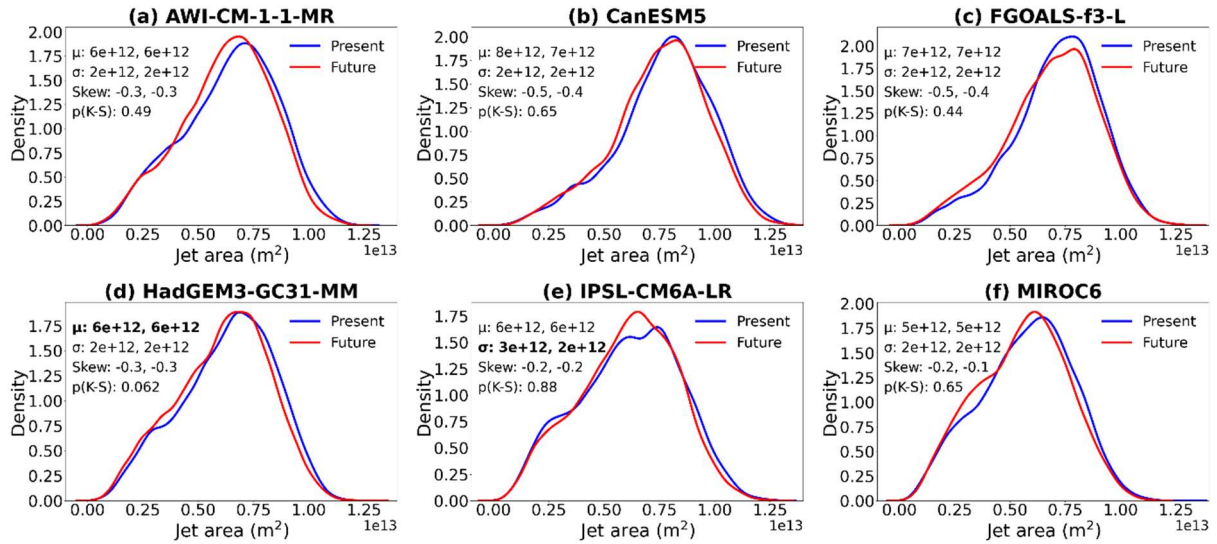

**Figure S1:** Distributions of daily jet area in winter for simulations forced by present-day (blue) and future (red) SIC. Data are for the largest mass jet object on each day and distributions have been fitted with a kernel density estimate. Ensemble mean ( $\mu$ ), standard deviation ( $\sigma$ ), skew and K-S test p-value for the distributions are shown in the legend. Means are bold where the difference between present-day and future simulations is statistically significant based on a t-test at the 95% confidence level. Standard deviations are bold where the difference between time periods is greater than for random sampling.

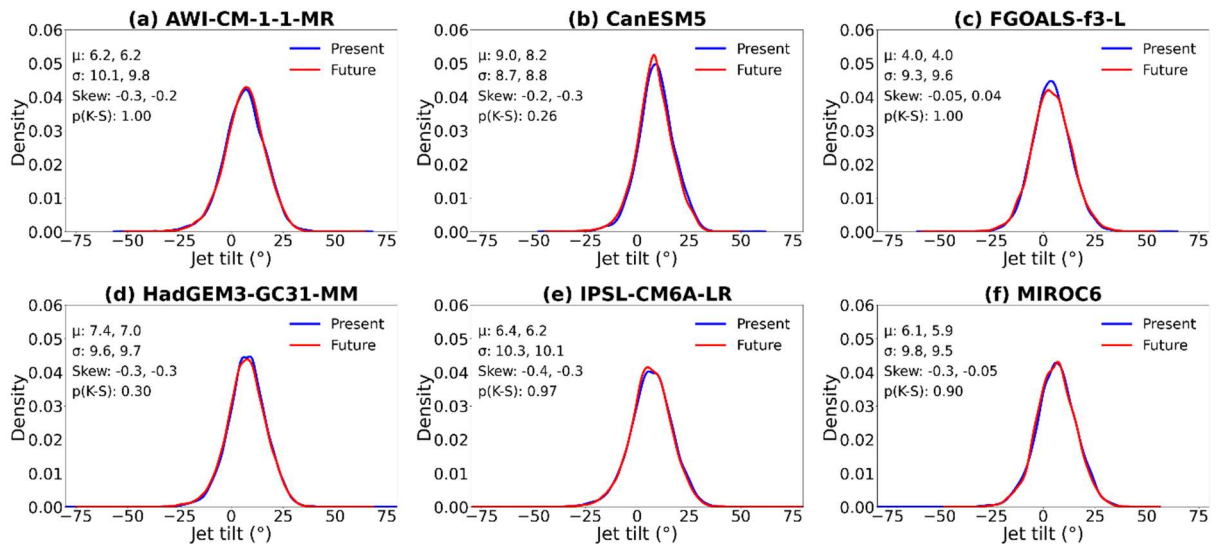

**Figure S2:** Distributions of daily jet tilt in winter for simulations forced by present-day (blue) and future (red) SIC. Data are for the largest mass jet object on each day and distributions have been fitted with a kernel density estimate. Ensemble mean ( $\mu$ ), standard deviation ( $\sigma$ ), skew and K-S test p-value for the distributions are shown in the legend.

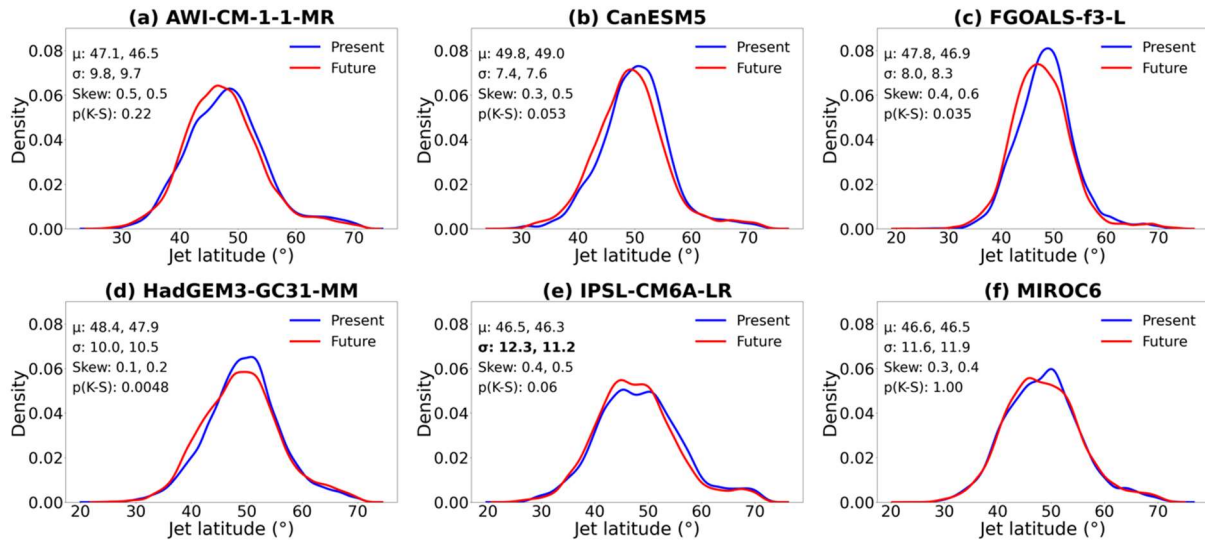

**Figure S3:** Distributions of daily jet latitude in winter for simulations forced by present-day and future SIC. The simulations are present-day SIC (blue line) and future SIC (red line). Data are for the largest mass object on each day and the second largest mass object for days with more than one jet object. Distributions have been fitted with a kernel density estimate. Ensemble mean ( $\mu$ ), standard deviation ( $\sigma$ ) and skew are shown. Standard deviations are bold where the difference between time periods is greater than for random sampling.
